# Supplementary material
Source: ML conference proceedings conference paper supplement (https://openreview.net/forum?id=yS9xU6ANiA)
Supplement: supplementary_material [file attachment]

|                                                                                     |                                  |                                                                                     |                                    |
|-------------------------------------------------------------------------------------|----------------------------------|-------------------------------------------------------------------------------------|------------------------------------|
|  | without Markov Boundary Masked   |  | Markov Boundary Masked (Endo. Cut) |
|  | Markov Boundary Masked (All Cut) |  | Markov Boundary Masked (No Cut)    |
