# Supplementary material
Source: ML conference proceedings conference paper supplement (https://openreview.net/forum?id=yS9xU6ANiA)
Supplement: supplementary_material [file attachment]

----- One Run      ●      Initial State      ✕      Final State
