# Supplementary material
Source: ML conference proceedings conference paper supplement (https://openreview.net/forum?id=yS9xU6ANiA)
Supplement: supplementary_material [file attachment]

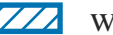

without Markov Boundary Masked

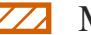

Markov Boundary Masked (Endo. Cut)

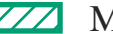

Markov Boundary Masked (All Cut)

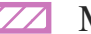

Markov Boundary Masked (No Cut)
